# Supplementary material
Source: PubMed Central journal article supplement (PMC3831882)
Supplement: NIHMS513875-supplement-9.pdf [file NIHMS513875-supplement-9.pdf]

## Supplemental Figure Legends

### Figure S1. IL6 is up-regulated in pancreatic cancer and required for PanIN formation

(A) Immunohistochemistry for IL6 in human pancreatic cancer. Red arrows indicate epithelial cells and green arrows indicate stromal cells. Scale bar 50µm. (B) Co-immunofluorescence staining for IL6 (green), SMA or CD45 (red), CK19 (magenta) and DAPI (blue). Scale bar 50µm. (C) IL6 immunostaining of primary mouse pancreatic fibroblasts exposed to conditioned medium from mouse pancreatic cancer cells. Scale bar 50µm. (D) RT-qPCR for *Il6* expression in primary mouse pancreatic fibroblasts exposed to conditioned medium from mouse pancreatic cancer cells. Data represent mean  $\pm$  SEM, n=3. (E) *Il6* expression in primary and commercial human pancreatic cancer cells. (F) Experimental design. (G) RT-qPCR for *Kras*<sup>\*</sup> and *Il6* expression in WT, iKras<sup>\*</sup> and iKras<sup>\*</sup>;IL6<sup>-/-</sup> mice pancreata. (H) Pathological analysis. Data represent mean  $\pm$  SEM, n=3. The statistical difference was determined by two-sided Student's t-test. \*\**p*<0.01, \*\*\**p*<0.001, #not significant. (I) HE and immunohistochemistry staining for IL6, p-Stat3 and p-ERK1/2 in iKras<sup>\*</sup>, iKras<sup>\*</sup>;IL6<sup>+/-</sup> and iKras<sup>\*</sup>;IL6<sup>-/-</sup> mice pancreata. Scale bar 50µm.

### Figure S2. Characterization of pancreatic immune infiltrate in iKras<sup>\*</sup>;IL6<sup>-/-</sup> mice

(A) Pancreatic immune cell infiltrate was measured by flow cytometry to determine the percentage of CD45<sup>+</sup> immune cells, CD3<sup>+</sup> T cells, CD3<sup>+</sup>/CD8<sup>+</sup> Tc cells, CD3<sup>+</sup>/CD4<sup>+</sup> Th cells, CD3<sup>+</sup>/CD4<sup>+</sup>/CD25<sup>+</sup>/FoxP3<sup>+</sup> Treg cells, CD11b<sup>+</sup>/F4/80<sup>+</sup> macrophages, CD11b<sup>+</sup>/Gr-1<sup>+</sup> MDSCs, CD11b<sup>+</sup>/Gr-1<sup>low</sup> MO-MDSCs and CD11b<sup>+</sup>/Gr-1<sup>hi</sup> PMN-MDSCs. (B) Toluidine blue staining for mast cells in iKras<sup>\*</sup> and iKras<sup>\*</sup>;IL6<sup>-/-</sup> mice pancreata. Scale bar 25µm.

**Figure S3. IHC staining of IL6, p-Stat3, p-Akt and SMA in iKras\* and iKras\*;IL6<sup>-/-</sup> pancreata**

(A) IL6; (B) p-Stat3; (C) p-Akt and (D) SMA levels in iKras\* and iKras\*;IL6<sup>-/-</sup> pancreata measured by immunohistochemistry. Scale bar 25µm.

**Figure S4. IL6 regulates the fibro-inflammatory environment and survival of pancreatic cancer**

(A) RT-qPCR for *MMP7*, *MMP9*, *MT1MMP* and *TIMP1* genes. Data represent mean ± SEM, each point indicates one animal. \**p*<0.05. (B) RT-qPCR for *Il2*, *Il4*, *Il10*, *Il11*, *Il17*, *Cox2*, *Tnfα* and *Ifny*. Data represent mean ± SEM, each point indicates one animal. (C) TUNEL staining in iKras\* and iKras\*;IL6<sup>-/-</sup> pancreata. Scale bar 25µm.

**Figure S5. IL6 regulates ROS accumulation and survival of PanIN cells**

(A) Cleaved caspase 3 measured by immunohistochemistry in iKras\* and iKras\*;IL6<sup>-/-</sup> pancreata. Scale bar 25µm. (B) RT-qPCR for pro-/anti-apoptotic genes ratio. Data represent mean ± SEM, each point indicates one animal. \**p*<0.05, \*\**p*<0.01. (C) Bright field images of primary mouse pancreatic cancer cell line 9805 treated with 600 µM H<sub>2</sub>O<sub>2</sub> alone, or in the presence of IL6 (50 ng/ml), or IL6 pre-incubated with anti-IL6 (8 µg/ml), for 1h. Scale bar 50µm. (D) Experimental design: NAC treatment was started in iKras\*;IL6<sup>-/-</sup> mice two weeks after pancreatitis induction and sustained for three weeks. (E) HE and immunohistochemistry staining for p-ERK1/2, p-Stat3 and Ki67 in NAC treated iKras\*;IL6<sup>-/-</sup> mice. Scale bar 50µm.

**Figure S6. MAPK and IL6 signaling pathways activity following Kras\* inactivation**

(A) Experimental design. (B) RT-qPCR for mutant *Kras*<sup>\*</sup> and *Il6* genes in control, *iKras*<sup>\*</sup> and *iKras*<sup>\*</sup>;*Il6*<sup>-/-</sup> pancreata. Data represent mean  $\pm$  SEM, each point indicates one animal. (C) Western blot for p-ERK1/2, total-ERK1/2, p-Stat3, p-Akt, total-Akt, Cleaved caspase 3 and GAPDH in *iKras*<sup>\*</sup> and *iKras*<sup>\*</sup>;*Il6*<sup>-/-</sup> pancreata. (D) IL6 and (E) p-Stat3 measured by immunohistochemistry in *iKras*<sup>\*</sup> and *iKras*<sup>\*</sup>;*Il6*<sup>-/-</sup> pancreata. Scale bar 25 $\mu$ m.

**Figure S7. IL6 deficiency facilitates tissue repair following *Kras*<sup>\*</sup> inactivation**

(A) PAS; (B) SMA immunohistochemistry and (C) Trichrome staining in *iKras*<sup>\*</sup> and *iKras*<sup>\*</sup>;*Il6*<sup>-/-</sup> pancreata. Scale bar 50 $\mu$ m.

**Figure S8. Acinar cell proliferation contributes to faster recovery following *Kras*<sup>\*</sup> inactivation in IL6 deficient mice**

(A) Mist1 immunohistochemistry. Scale bar 25 $\mu$ m. (B) Ki67 immunohistochemistry. Scale bar 25 $\mu$ m. (C) Co-immunofluorescence staining for CK19 (red), Ki67 (green), SMA (magenta) and DAPI (blue). Scale bar 25 $\mu$ m. (D) Ki67 proliferation index in CK19(+), CK19(-) epithelium and SMA(+) stroma. Data represent mean  $\pm$  SEM, n=3. The statistical difference was determined by two-sided Student's t-test. \**p*<0.05, \*\**p*<0.01.
