# Supplementary material
Source: PubMed Central journal article supplement (PMC3831882)

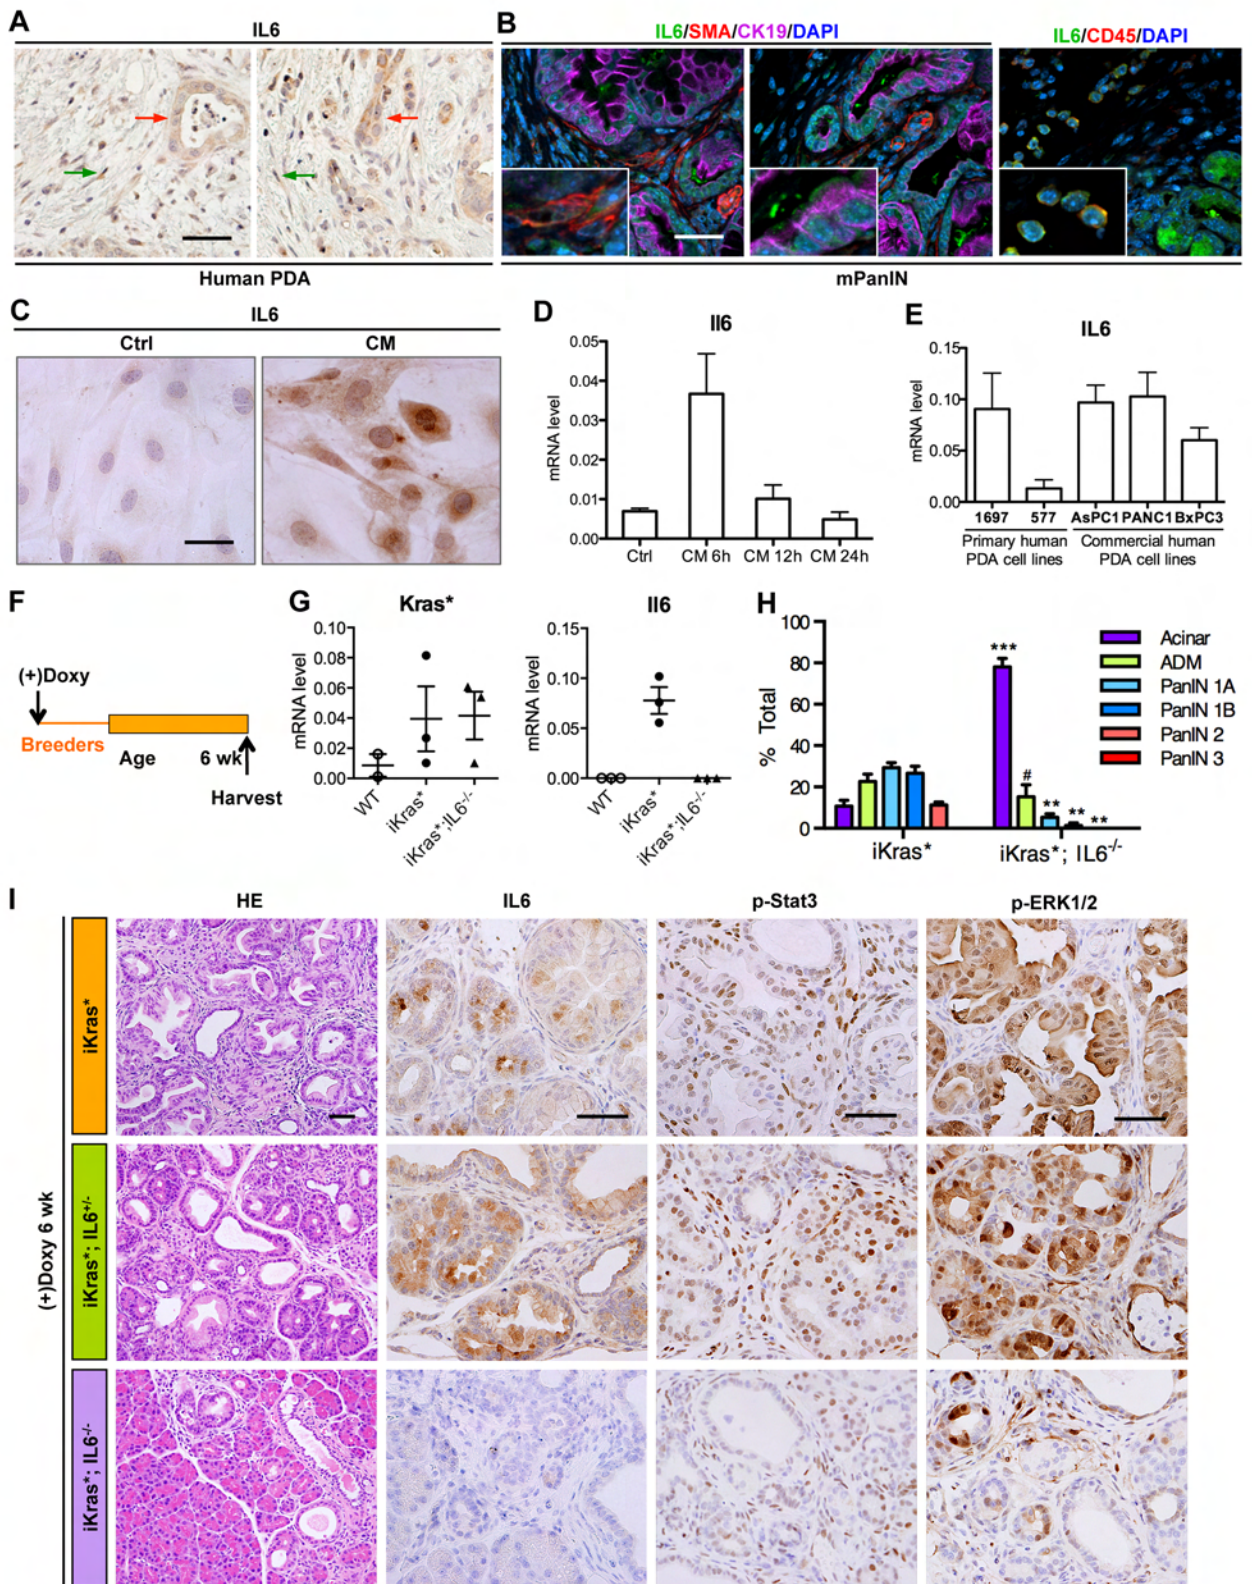

Figure S1

Supplement: NIHMS513875-supplement-1.pdf [file NIHMS513875-supplement-1.pdf]

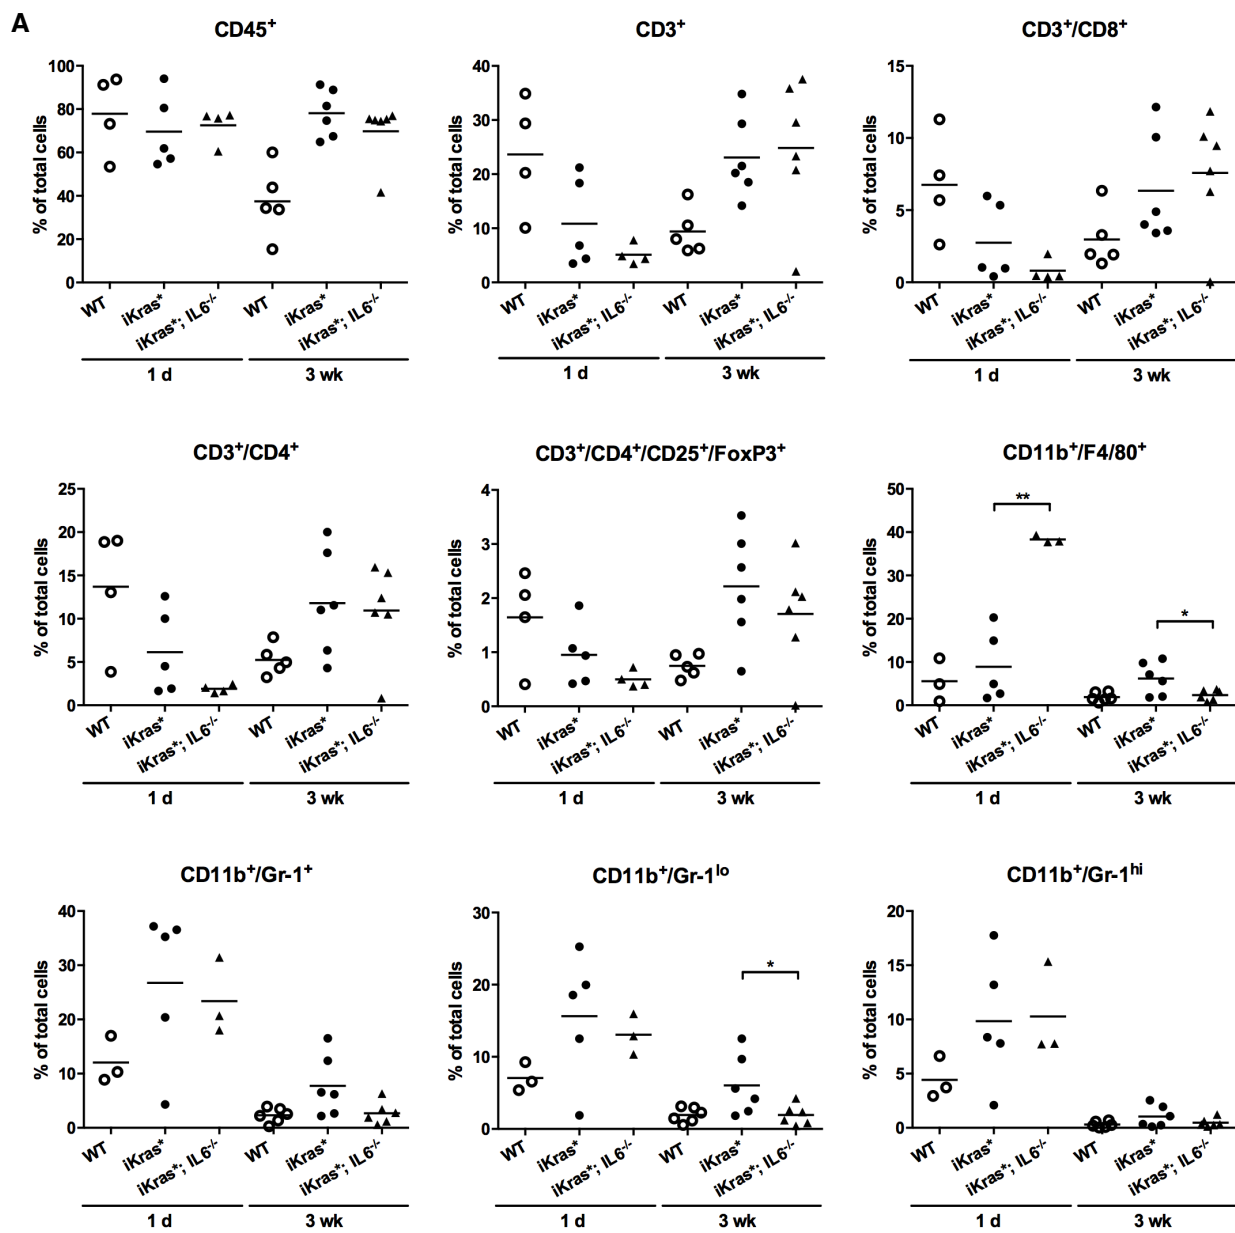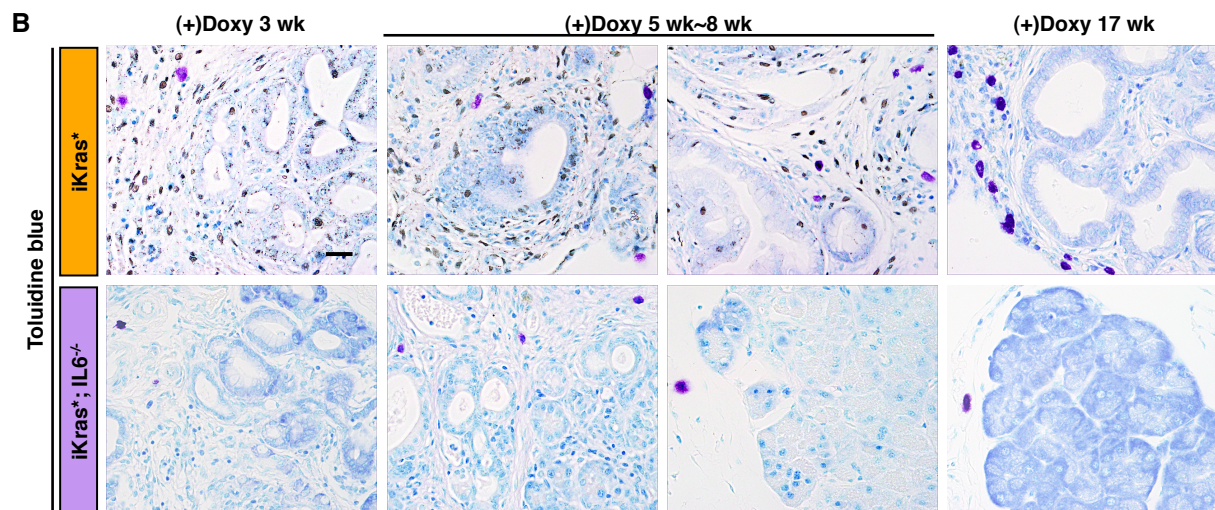

Figure S2

Supplement: NIHMS513875-supplement-2.pdf [file NIHMS513875-supplement-2.pdf]

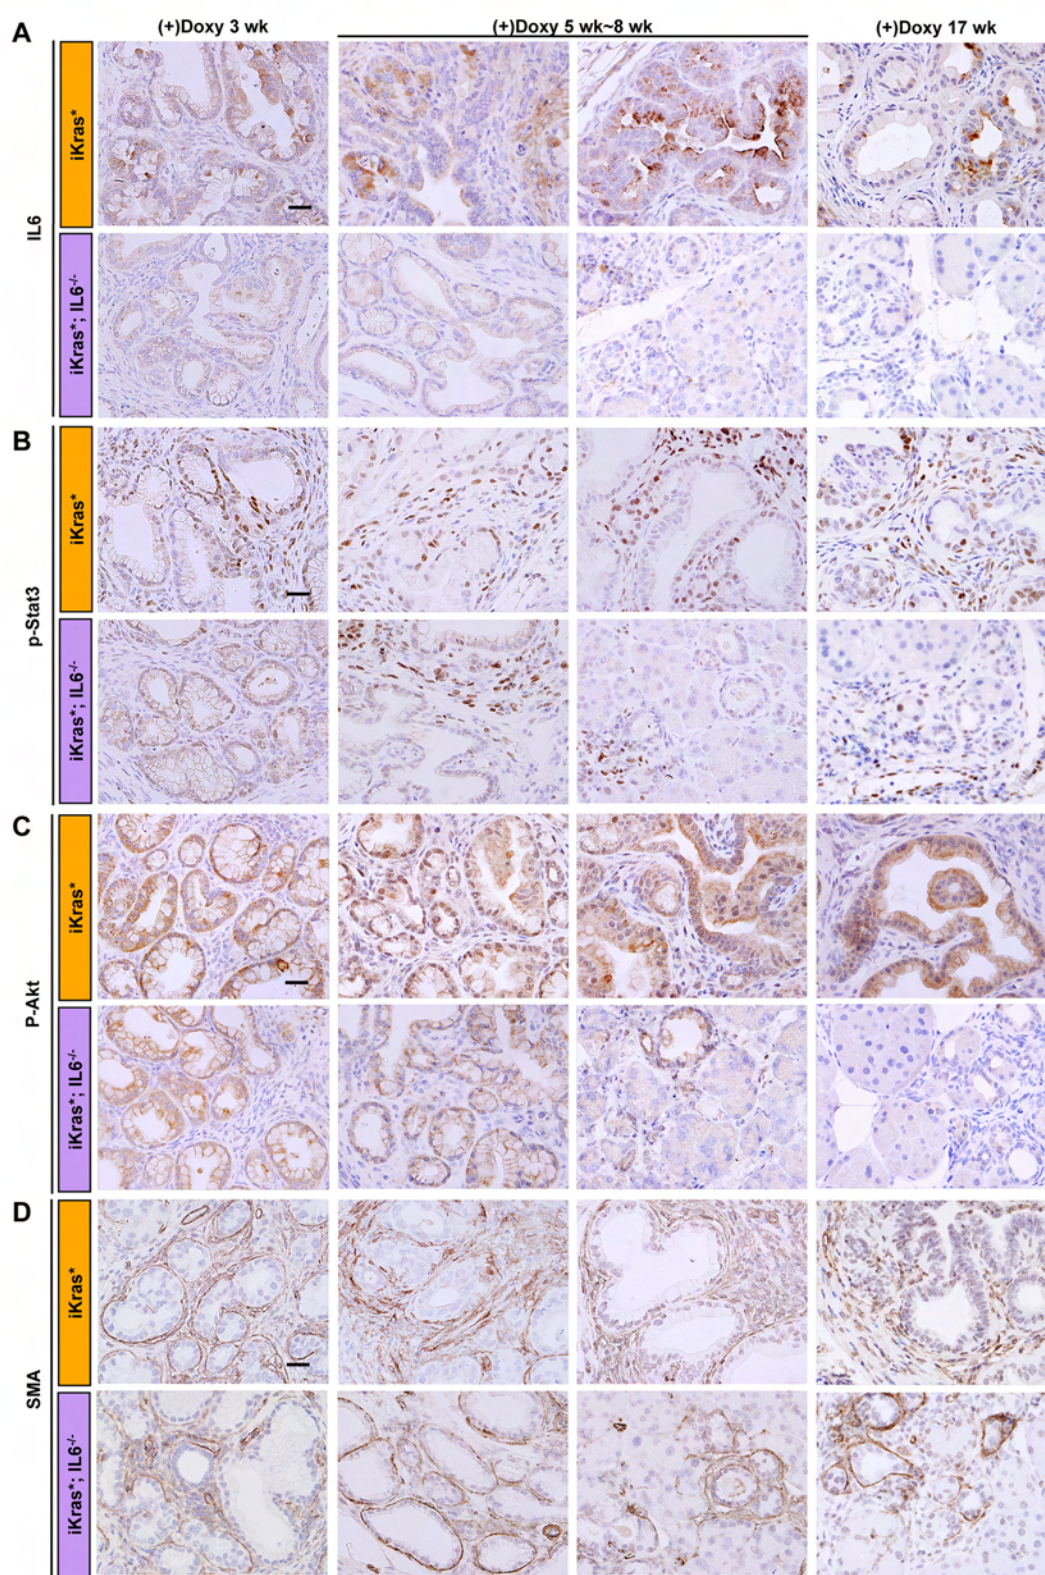

Figure S3

Supplement: NIHMS513875-supplement-3.pdf [file NIHMS513875-supplement-3.pdf]

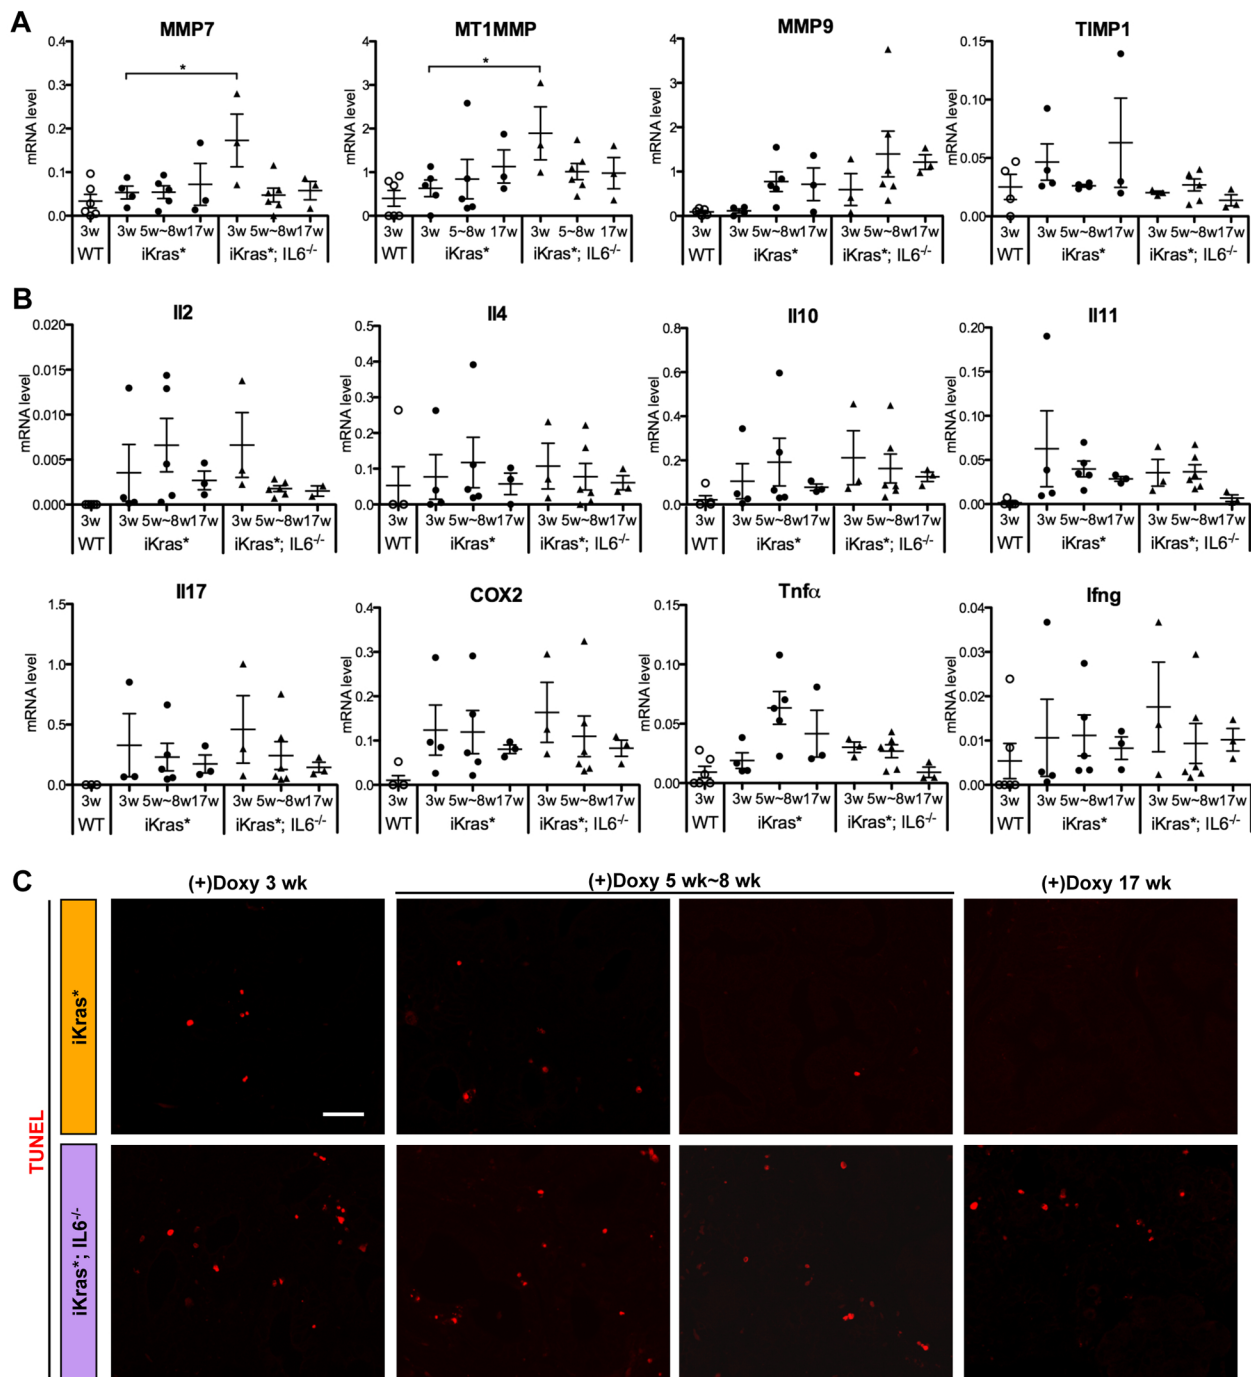

Supplement: NIHMS513875-supplement-4.pdf [file NIHMS513875-supplement-4.pdf]

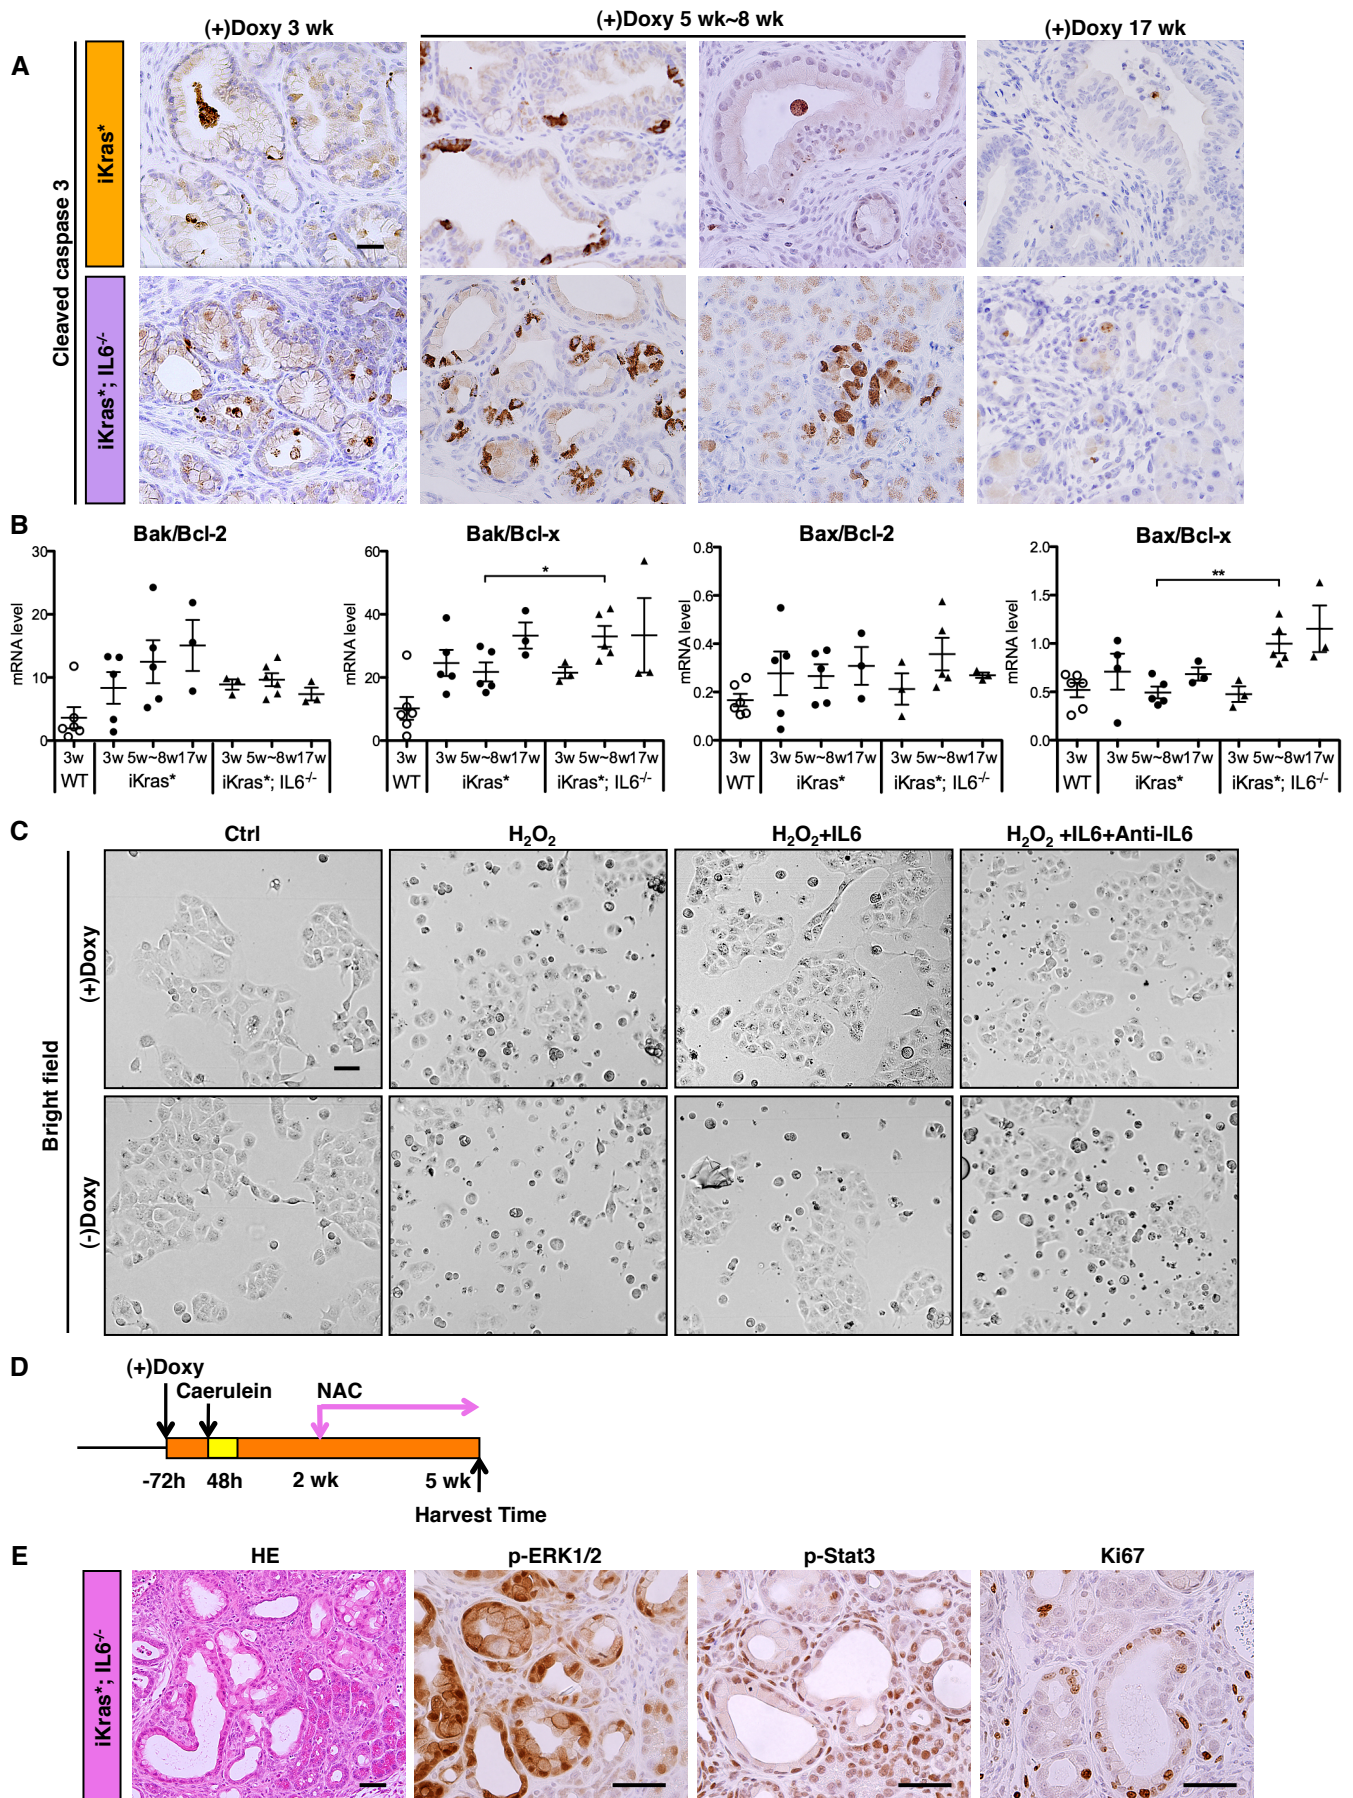

Figure S5

Supplement: NIHMS513875-supplement-5.pdf [file NIHMS513875-supplement-5.pdf]

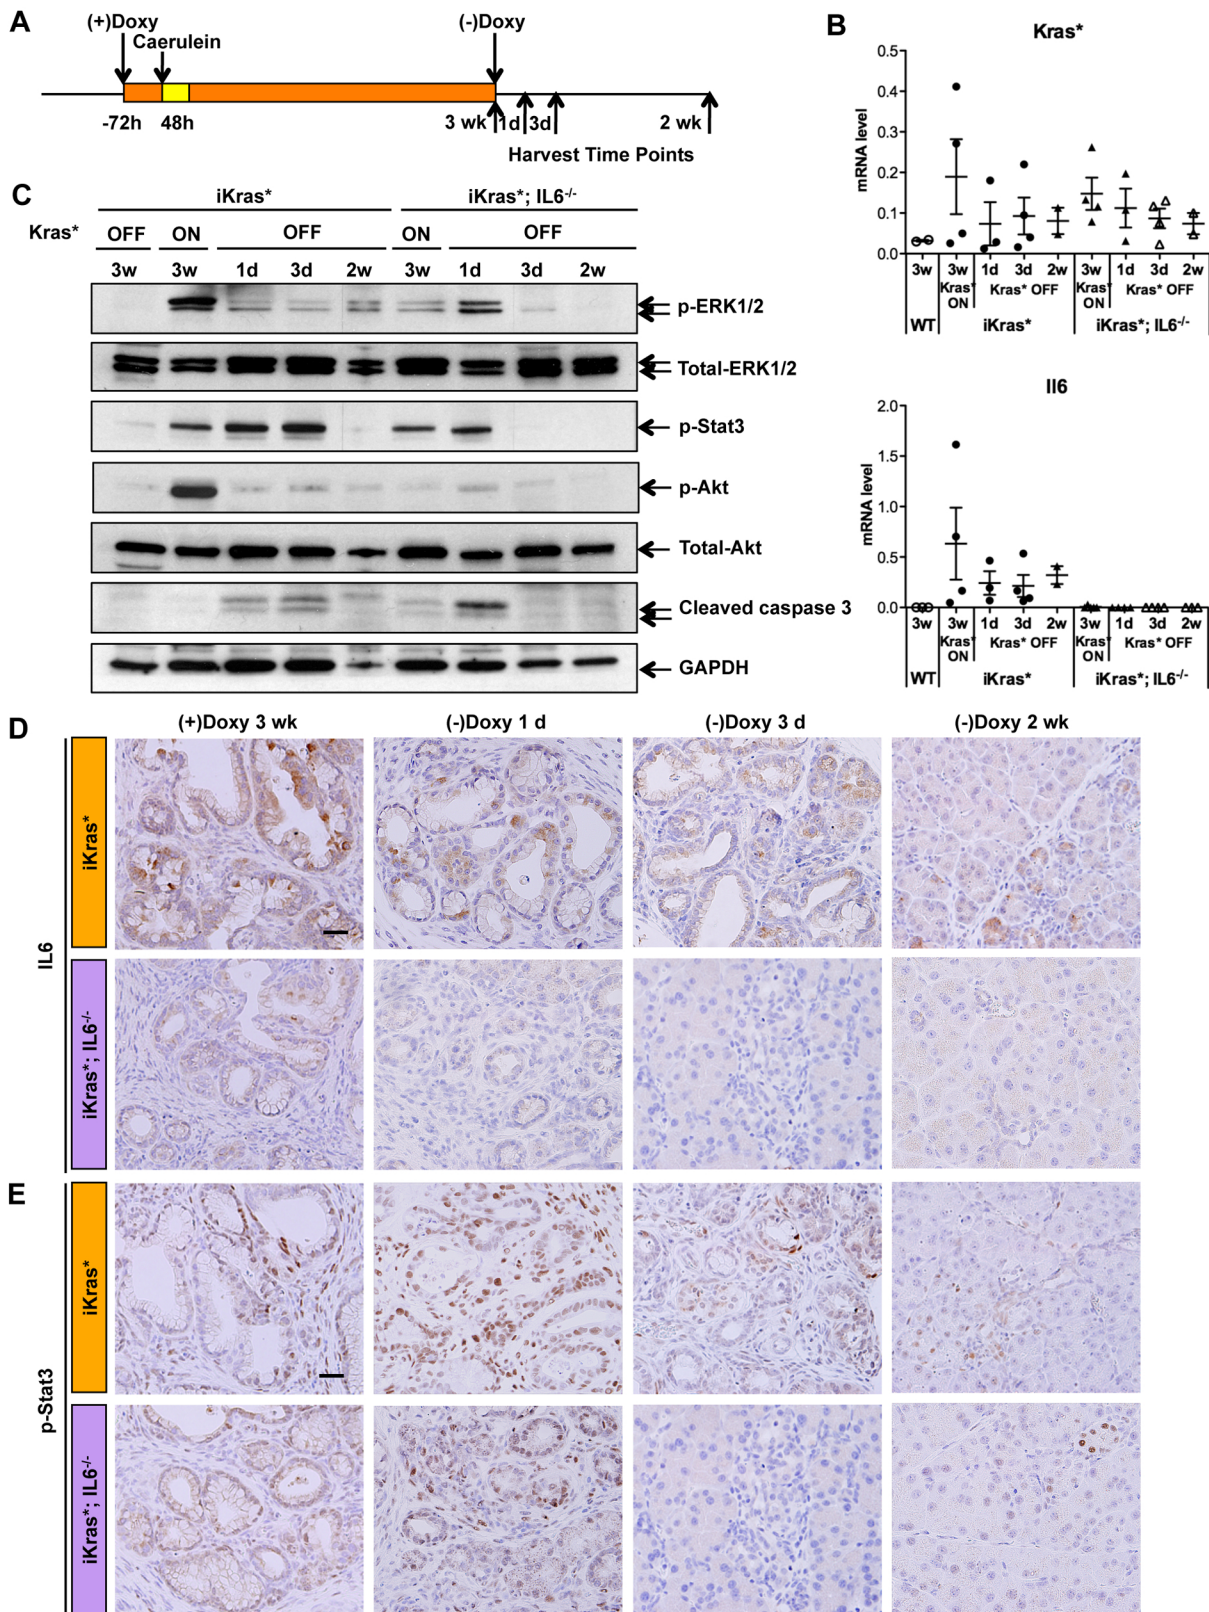

Figure S6

Supplement: NIHMS513875-supplement-6.pdf [file NIHMS513875-supplement-6.pdf]

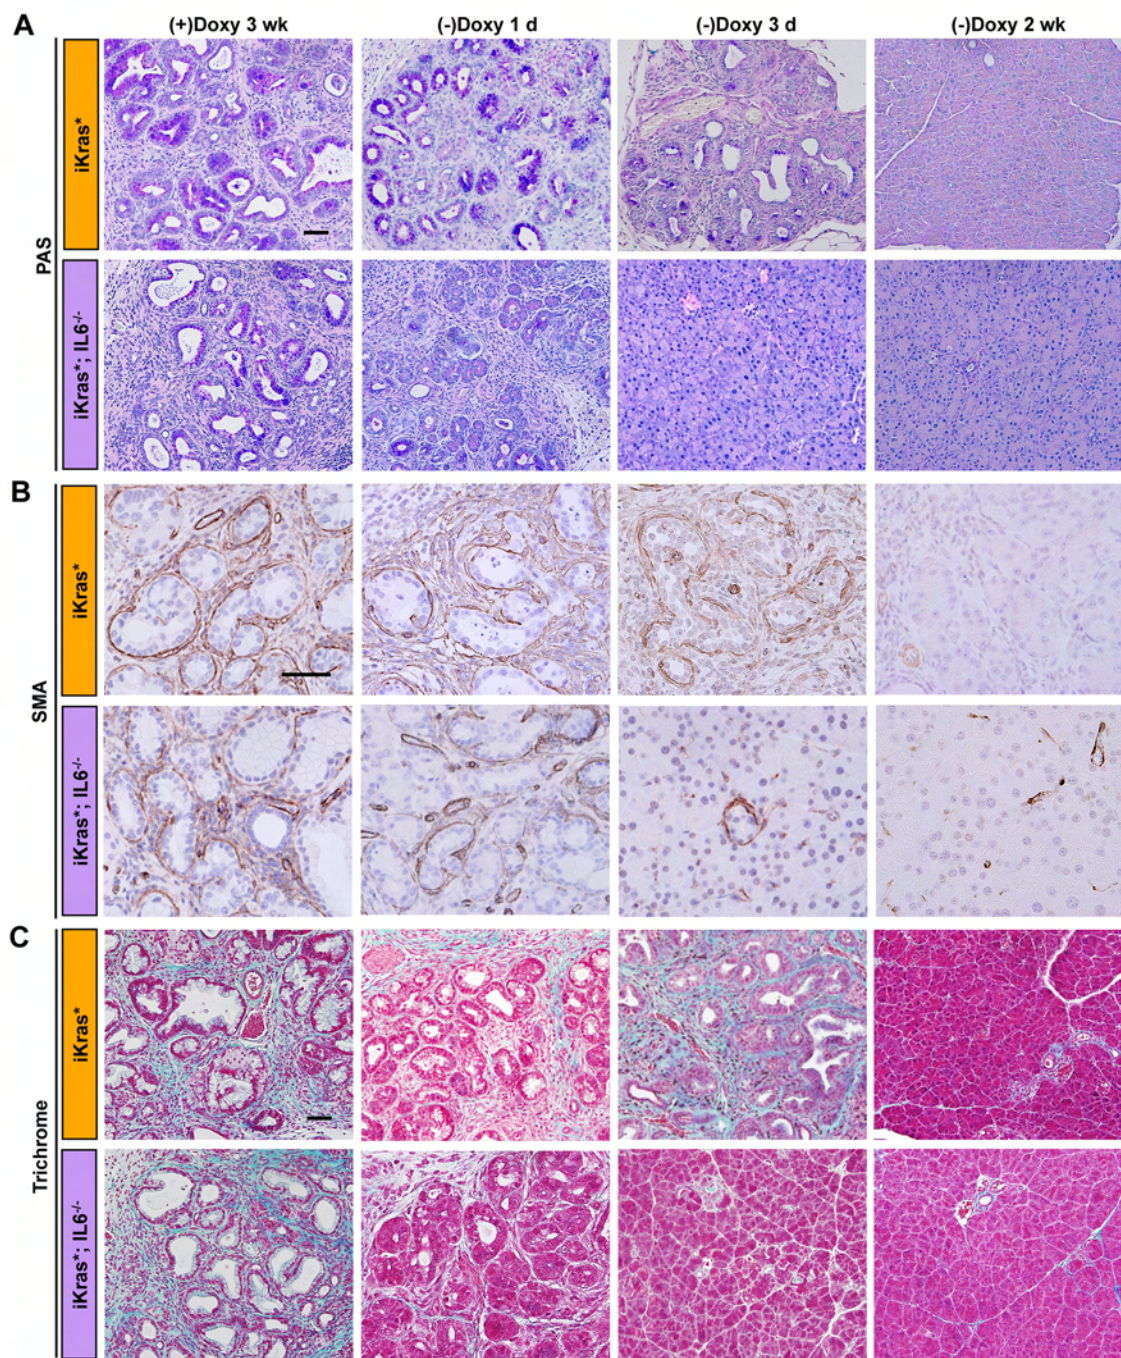

Figure S7

Supplement: NIHMS513875-supplement-7.pdf [file NIHMS513875-supplement-7.pdf]

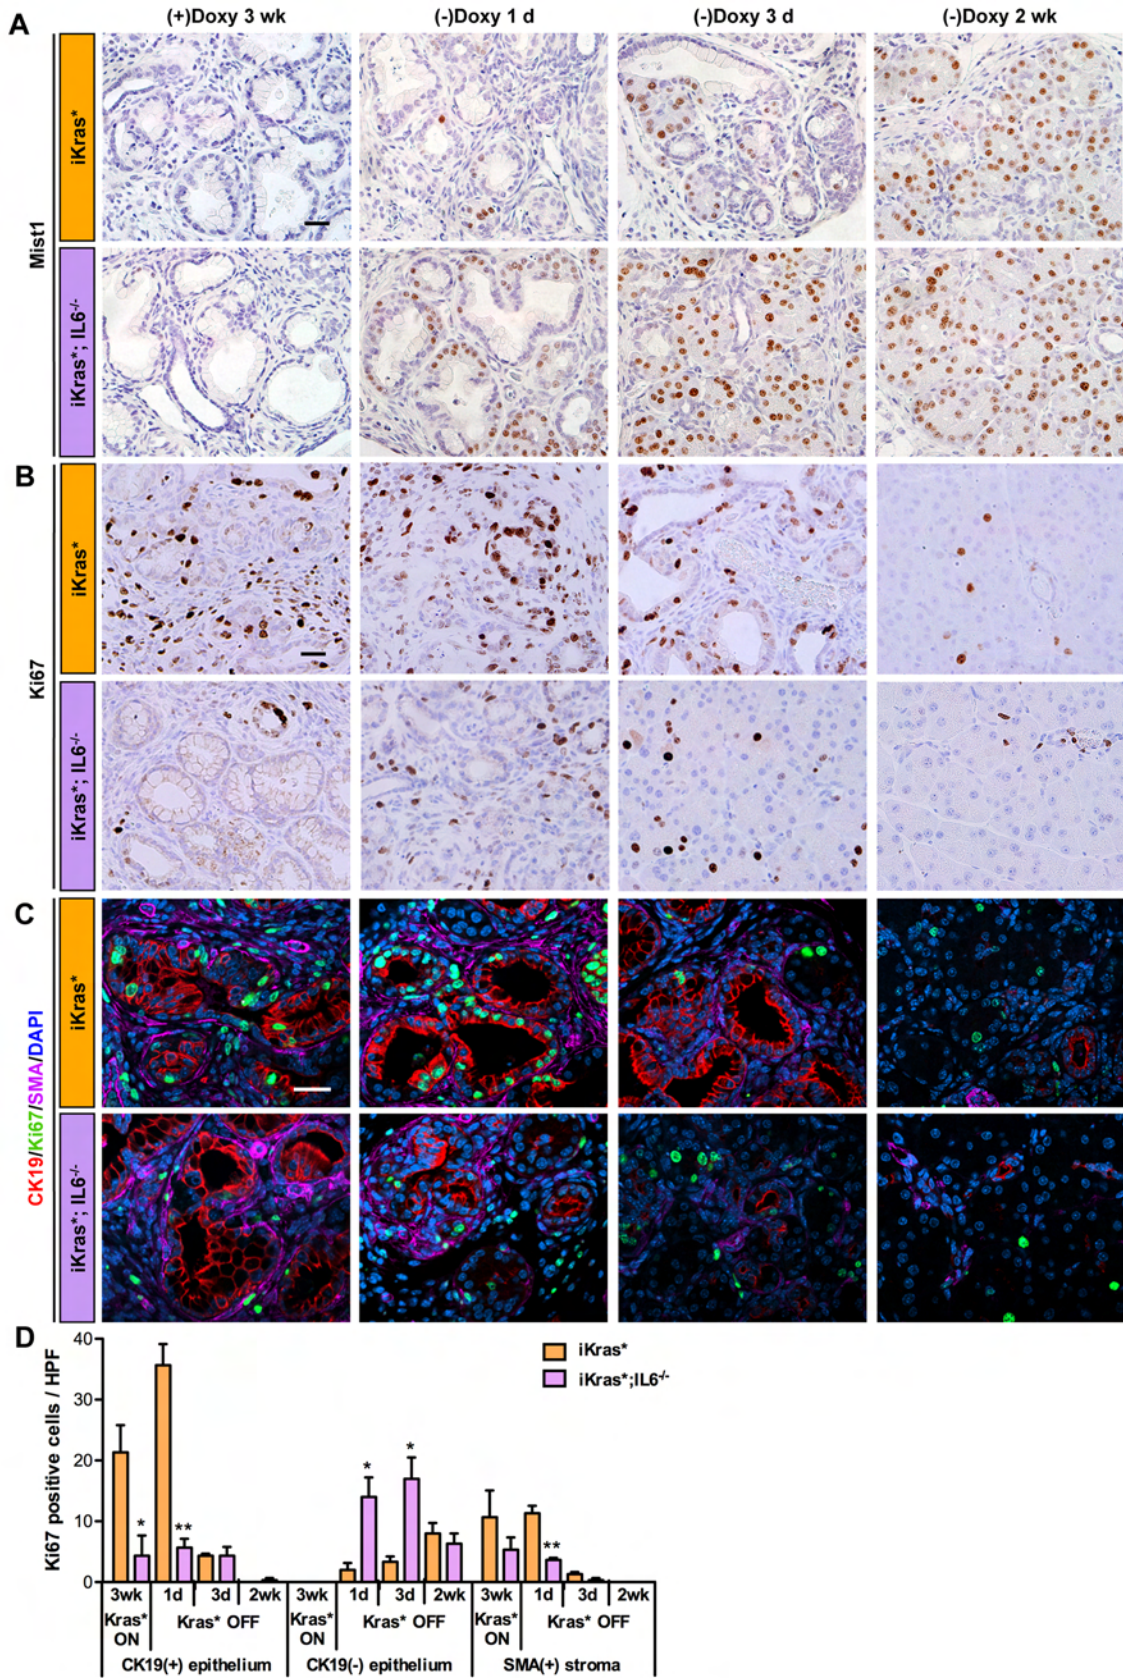

Figure S8

Supplement: NIHMS513875-supplement-8.pdf [file NIHMS513875-supplement-8.pdf]
